# Supplementary material for: Validation and implementation of whole-genome sequencing-based analytical methods for molecular surveillance and relatedness analysis of Mycobacterium tuberculosis complex isolates at a national reference laboratory
Source: PubMed Central journal article supplement — Heliyon. 2024 Nov 8;10(22):e40279. doi: 10.1016/j.heliyon.2024.e40279 (PMC11617709; doi:10.1016/j.heliyon.2024.e40279), 2024-11-08

**Figure 1S. Whole genome sequencing algorithm in use at the Irish Mycobacteria Reference Laboratory for Identification, Drug resistance prediction, genotyping and relatedness of *Mycobacterium tuberculosis* Complex**

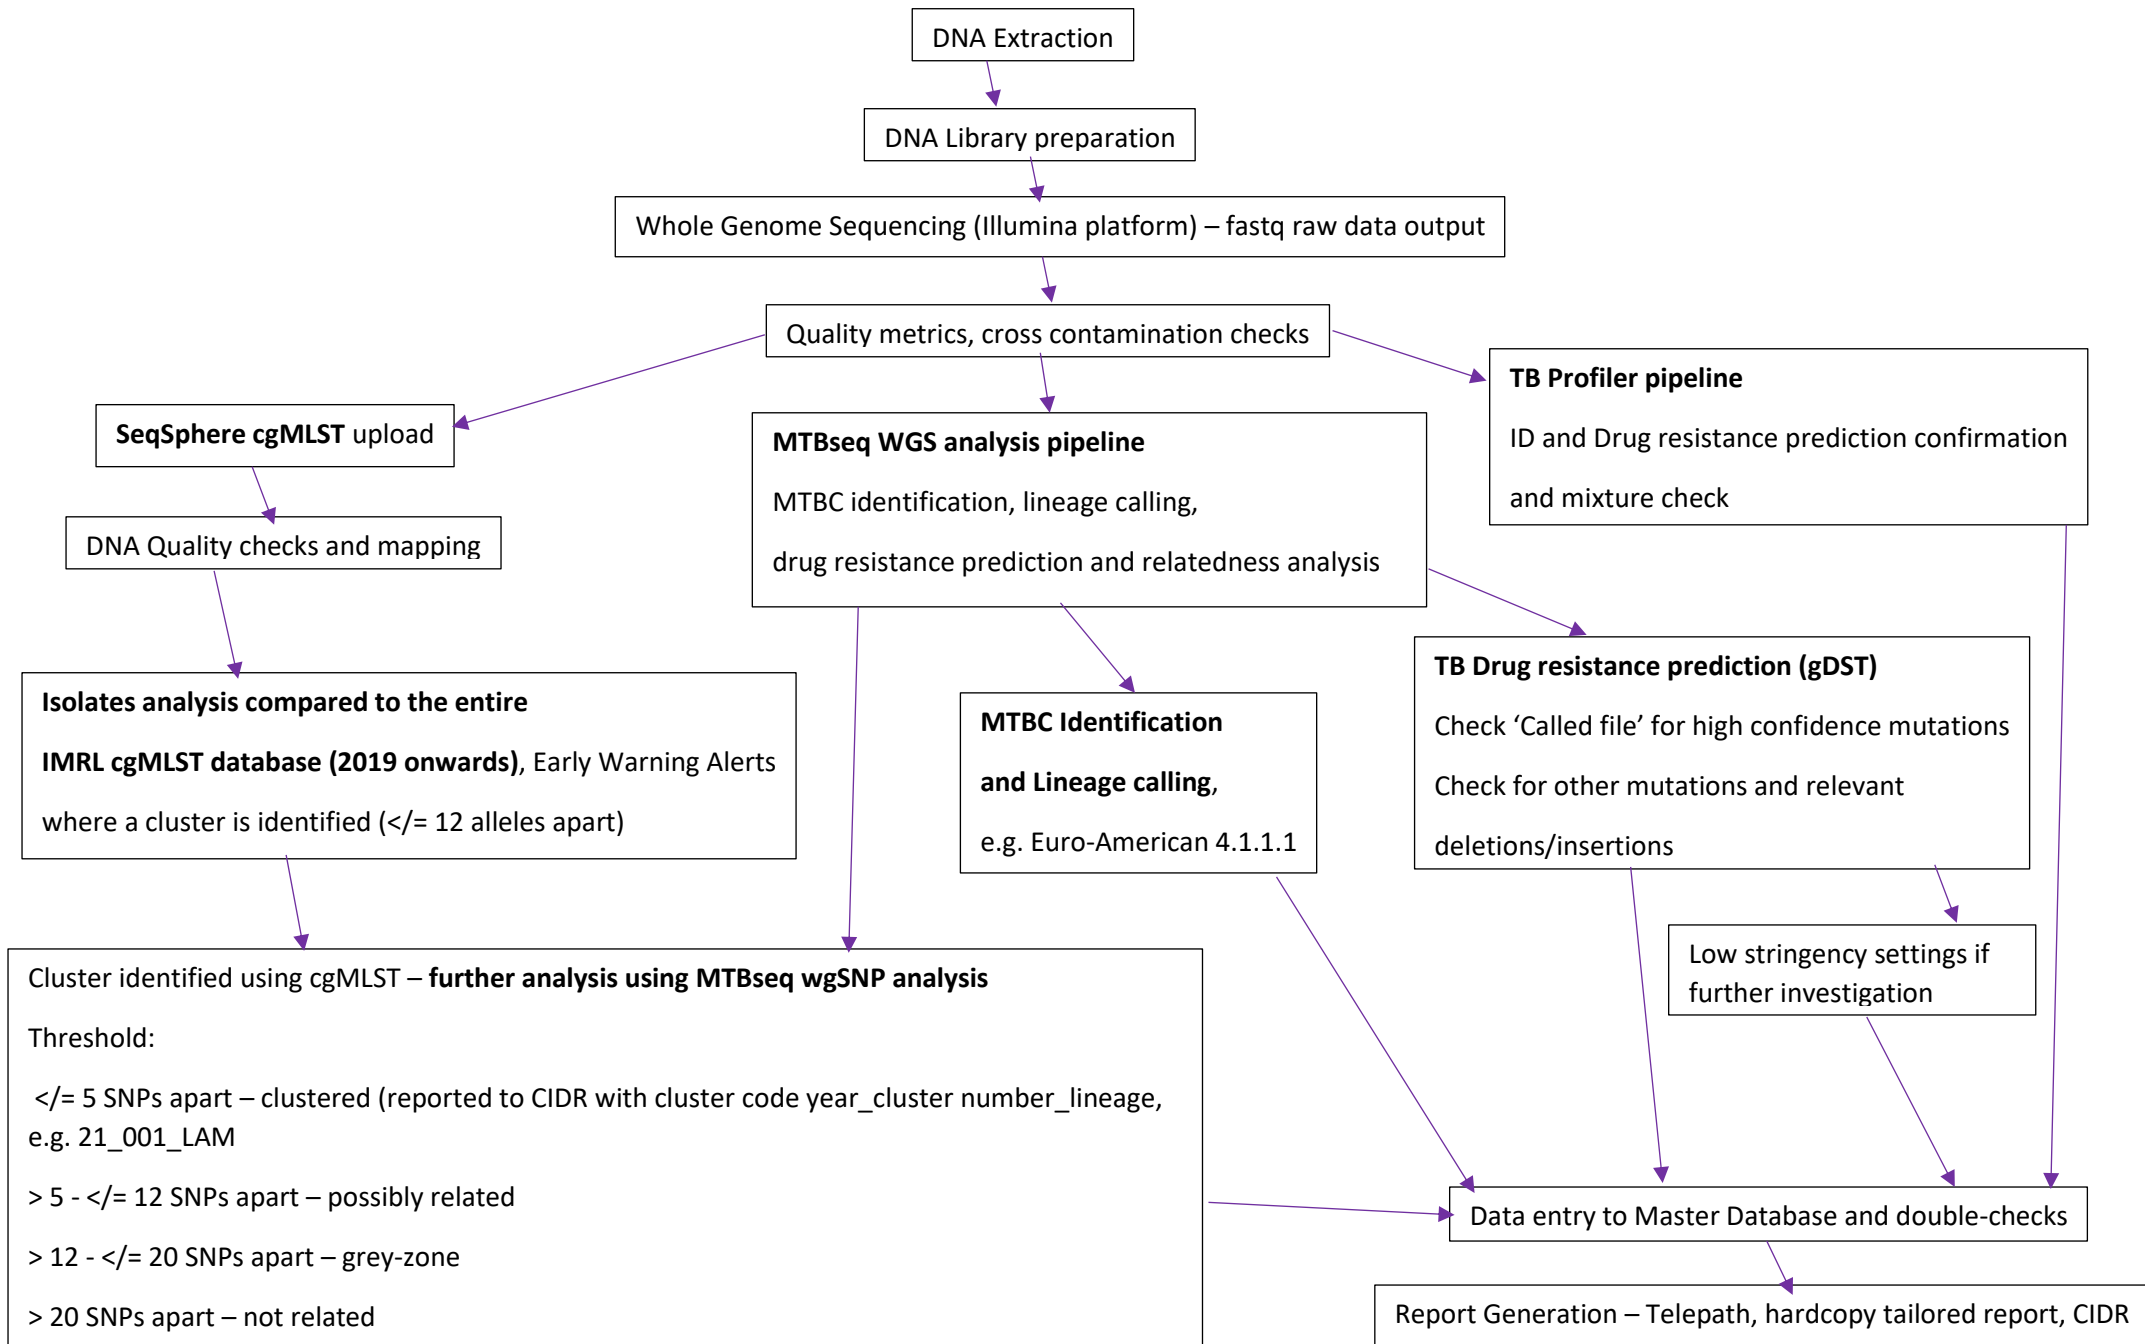

Supplement: mmc2.pdf [file mmc2.pdf]
